# Supplementary material for: Study of photogenerated exciton dissociation in transition metal dichalcogenide van der Waals heterojunction A2-MWS4: a first-principles study
Source: Royal Society of Chemistry journal article supplement (doi:10.1039/d1cp03857e), 2021-01-01
Supplement: d1cp03857e1.pdf [file d1cp03857e1.pdf]

Supporting Information for:

**Study of photogenerated exciton dissociation in transition metal  
dichalcogenide van der Waals heterojunction A<sub>2</sub>-MWS<sub>4</sub>: A first-  
principle study**

Hong Cui,<sup>a, b</sup> Yazhou Wang,<sup>\*a, b</sup> Tong Liu,<sup>a, b</sup> Yunjian Chen,<sup>a, b</sup> Pengyue Shan,<sup>a, b</sup> Xue Bai,<sup>a, b</sup> Qi Jiang,<sup>a, b</sup>  
Xingchen Zhao,<sup>a, b</sup> Zequan Li,<sup>a, b</sup> Xujie Li,<sup>a, b</sup> Fangfang Chen,<sup>a, b</sup> Jiajun Zhang,<sup>a, b</sup> Yang Han,<sup>a, b</sup> Rong Feng,<sup>a, b</sup>  
Qin Kang,<sup>a, b</sup> Hongkuan Yuan<sup>c</sup>

**Tab. S 1** Self-consistent energy of A2-MWS<sub>4</sub> with different values of cut-off energy.

| Cut-off energy (eV) | Energy (eV) |
|---------------------|-------------|
| 400                 | -43.387     |
| 450                 | -43.388     |
| 500                 | -43.391     |
| 550                 | -43.391     |
| 600                 | -43.391     |
| 650                 | -43.392     |
| 700                 | -43.392     |

As indicated in **Tab. S 1**, the cut-off energy of A2-MWS<sub>4</sub> was set to 500eV because the calculation method was performed using the HSE (06) and GW0+BSE.[1, 2]

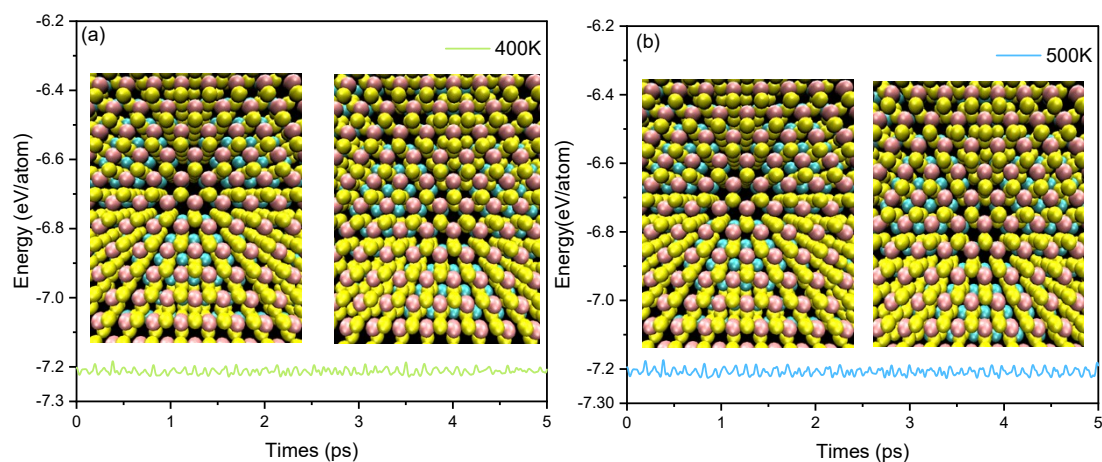

**Fig. S 1** Variation of average atomic energy with dynamic steps in AIMD simulations of A2-MWS<sub>4</sub> at different temperatures. (a)400K. (b)500K. The inset(right) of the figure showed a snapshot of the structure at the point of maximum energy fluctuation.

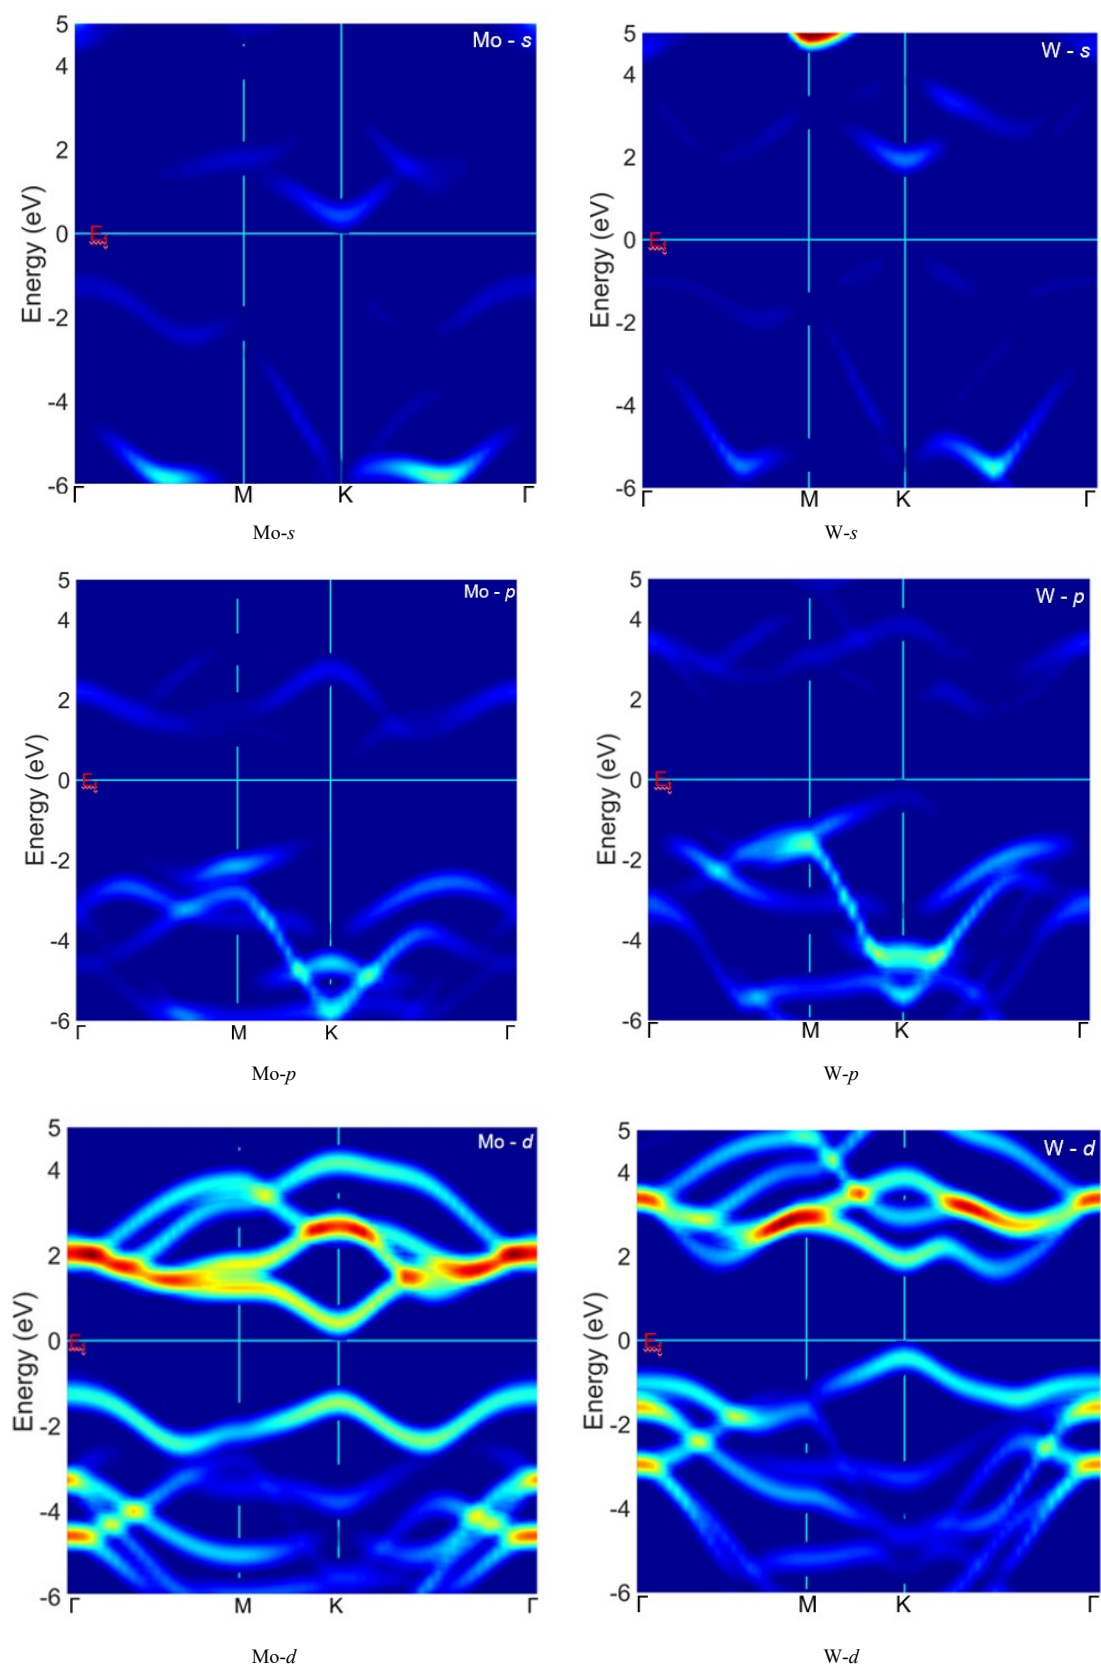

Fig. S2 A2-MWS<sub>4</sub> partial (Mo, and W) band structures.

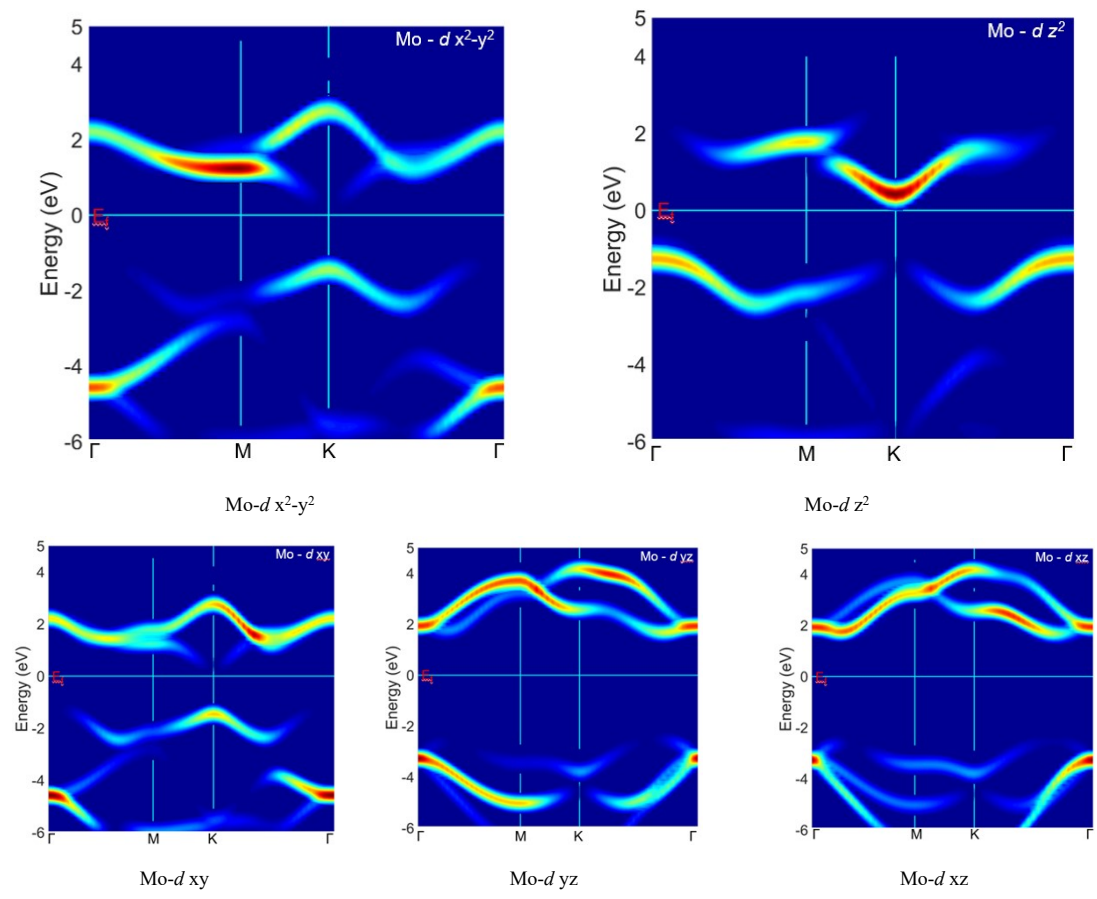

**Fig. S3** A2-MWS<sub>4</sub> partial (Mo) band structures.

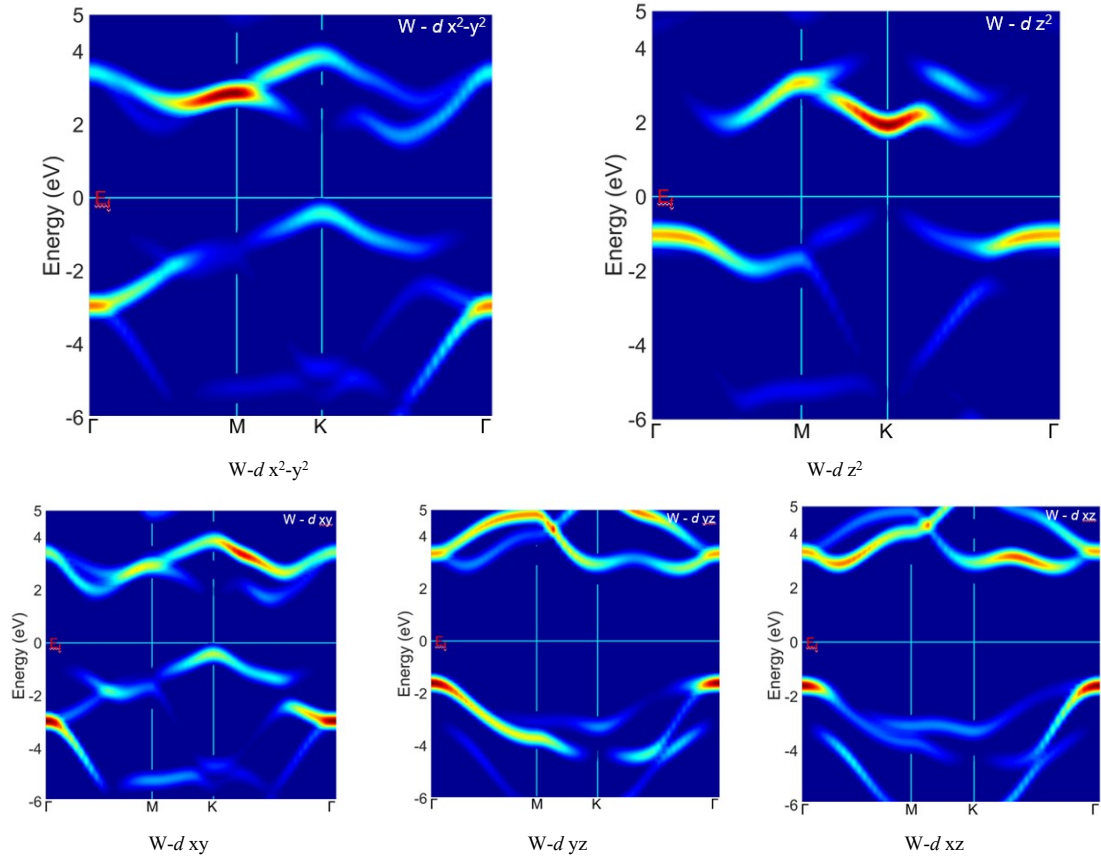

**Fig. S4** A2-MWS4 partial(W) band structures.

As shown in **Fig. S2**, **Fig. S3**, and **Fig. S4**, the VBM of A2-MWS4 is mainly contributed by the  $d$  ( $d xy$ , and  $d x^2-y^2$ ) orbitals of W atoms and the CBM is mainly contributed by the  $d$  ( $d z^2$ ) orbitals of MoS2.

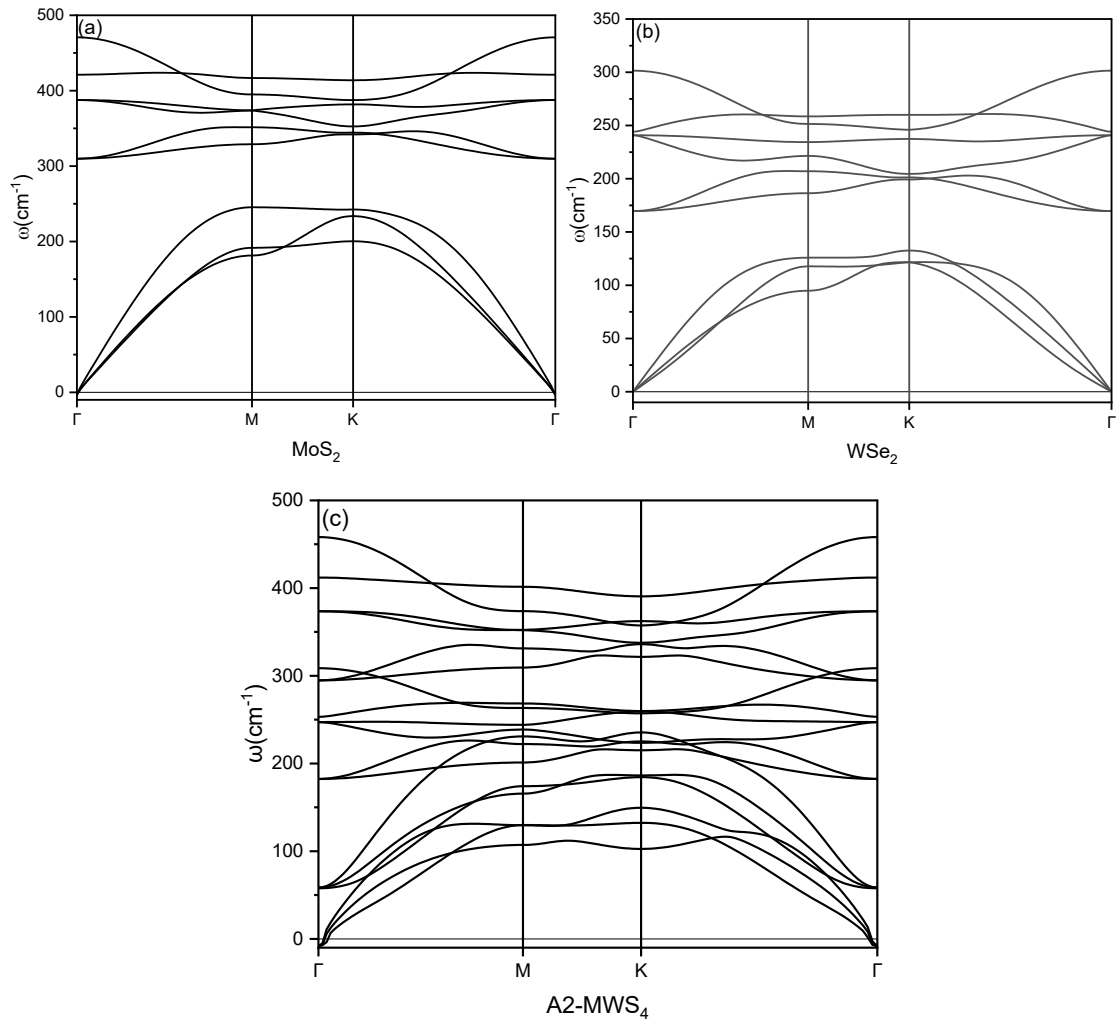

**Fig. S5** The phonon dispersion curve of (a)  $\text{MoS}_2$ , (b)  $\text{WSe}_2$ , (c)  $\text{A2-MWS}_4$ .

As seen in **Fig. S5**, the phonon dispersion curve of  $\text{A2-MWS}_4$ ,  $\text{WSe}_2$ , and  $\text{MoS}_2$  had small imaginary frequency ( $\sim 8.42 \text{ cm}^{-1}$ ,  $\sim 0.07 \text{ cm}^{-1}$ , and  $\sim 1 \text{ cm}^{-1}$ ) around the  $\Gamma$  point. These imaginary modes may be caused by the non-optimal lattice constants and the finite supercell size, which indicates that the structures was thermodynamically stable.

## References

- [1] Hwang YH, Yun WS, Cha G-B, Hong SC, Han SW. Thermally driven homonuclear-stacking phase of  $\text{MoS}_2$  through desulfurization. *Nanoscale*. 2019;11:11138-44.
- [2] Hsu W-T, Lu L-S, Wang D, Huang J-K, Li M-Y, Chang T-R, et al. Evidence of indirect gap in monolayer  $\text{WSe}_2$ . *Nature Communications*. 2017;8:929.
